# Supplementary material for: Morphology, dynamic disorder, and charge transport in an indoloindole-based hole-transporting material from a multi-level theoretical approach
Source: Royal Society of Chemistry journal article supplement (doi:10.1039/d3fd00144j), 2023-08-21
Supplement: d3fd00144j1.pdf [file d3fd00144j1.pdf]

## Supplementary Information

**Morphology, dynamic disorder, and charge transport in an indoloindole-based hole-transporting material from a multi-level theoretical approach**

Manuel Pérez-Escribano,<sup>a,†</sup> Alberto Fernández-Alarcón,<sup>a,†</sup> Enrique Ortí,<sup>a</sup> Juan Aragón,<sup>a</sup> Jesús Cerdá,<sup>b,\*</sup> Joaquín Calbo<sup>a,\*</sup>

<sup>a</sup> Instituto de Ciencia Molecular, Universidad de Valencia, 46890 Paterna, Spain

<sup>b</sup> Laboratory for Chemistry of Novel Materials, Materials Research Institute, University of Mons-UMONS, Mons 7000, Belgium

E-mail: [jesus.cerdacalatayud@umons.ac.be](mailto:jesus.cerdacalatayud@umons.ac.be); [joaquin.calbo@uv.es](mailto:joaquin.calbo@uv.es)

<sup>†</sup> These authors contributed equally

## Kinetic Monte Carlo

The electronic mobility has been evaluated using the kinetic Monte Carlo approach<sup>1</sup> implemented in a home-made code. In the kinetic Monte Carlo, we perform a stochastic dynamic simulation of the hopping of a single charge carrier. We use the direct method based on Gillespie algorithm,<sup>2,3</sup> where an adaptative timestep ( $\tau$ ) is calculated as:

$$\tau = -\frac{\ln(r_1)}{a_0} \quad (1)$$

where  $r_1$  is a random number and  $a_0$  is the summation of the rate constants corresponding to all possible charge hopping paths,  $a_0 = \sum_i k_i$ . On the other hand, the direction of each individual hop is decided by using a second random number ( $r_2$ ) according to the following condition:

$$\frac{\sum_{i=1}^{i-1} k_i}{a_0} < r_2 < \frac{\sum_{i=1}^i k_i}{a_0} \quad (2)$$

where at each hop, the rate constants are computed according to the classical Marcus rate expression.<sup>4</sup> Additionally, in order to take into account the instantaneous fluctuations due to the dynamical disorder,  $V$  and  $\Delta E$  are obtained for each hop according to:

$$V = \text{gauss\_random}(r_3, \langle V \rangle, \sigma_V) \quad (3)$$

$$\Delta E = \text{gauss\_random}(r_4, \langle \Delta E \rangle, \sigma_{\Delta E}) + q\mathbf{F}\mathbf{r} \quad (4)$$

where `gauss_random` is a function that computes a random number ( $r_3$  and  $r_4$ ) according to a normal distribution with given parameters (mean value and standard deviation) previously obtained,  $q$  is the charge,  $\mathbf{r}$  is the displacement vector for the hopping path, and  $\mathbf{F}$  is the applied electric field along the measured direction.

The position of the charge carrier is tracked along the hopping dynamics and the final charge mobility ( $\mu$ ) is computed with a similar expression to those used in master equation approaches:<sup>5,6</sup>

$$\mu = \frac{\mathbf{r}\mathbf{F}}{t|\mathbf{F}|^2} \quad (5)$$

where  $\mathbf{r}$  is the total displacement vector from the initial to the last charge carrier position at the end of the kinetic simulation,  $t$  is the time at the end of the simulation and  $\mathbf{F}$  is the applied electric field.

**Table S1.** Crystal cell parameters for IDIDF.

| Structure    | a (Å) | b (Å)  | c (Å)  | $\alpha$ (°) | $\beta$ (°) | $\gamma$ (°) |
|--------------|-------|--------|--------|--------------|-------------|--------------|
| Experimental | 5.535 | 13.714 | 17.791 | 68.19        | 82.84       | 80.89        |
| DFT          | 5.549 | 13.943 | 17.746 | 67.13        | 81.42       | 79.53        |
| DFT+vdW      | 5.011 | 13.077 | 18.790 | 66.51        | 80.73       | 81.95        |

**Table S2.** Crystal cell parameters for spiro-OMeTAD.

| Structure    | a (Å)  | b (Å)  | c (Å)  | $\alpha$ (°) | $\beta$ (°) | $\gamma$ (°) |
|--------------|--------|--------|--------|--------------|-------------|--------------|
| Experimental | 13.661 | 14.720 | 17.277 | 86.23        | 68.98       | 80.01        |
| DFT          | 13.782 | 14.629 | 17.554 | 85.72        | 69.37       | 79.52        |
| DFT+vdW      | 13.316 | 14.531 | 17.015 | 86.26        | 68.42       | 79.88        |

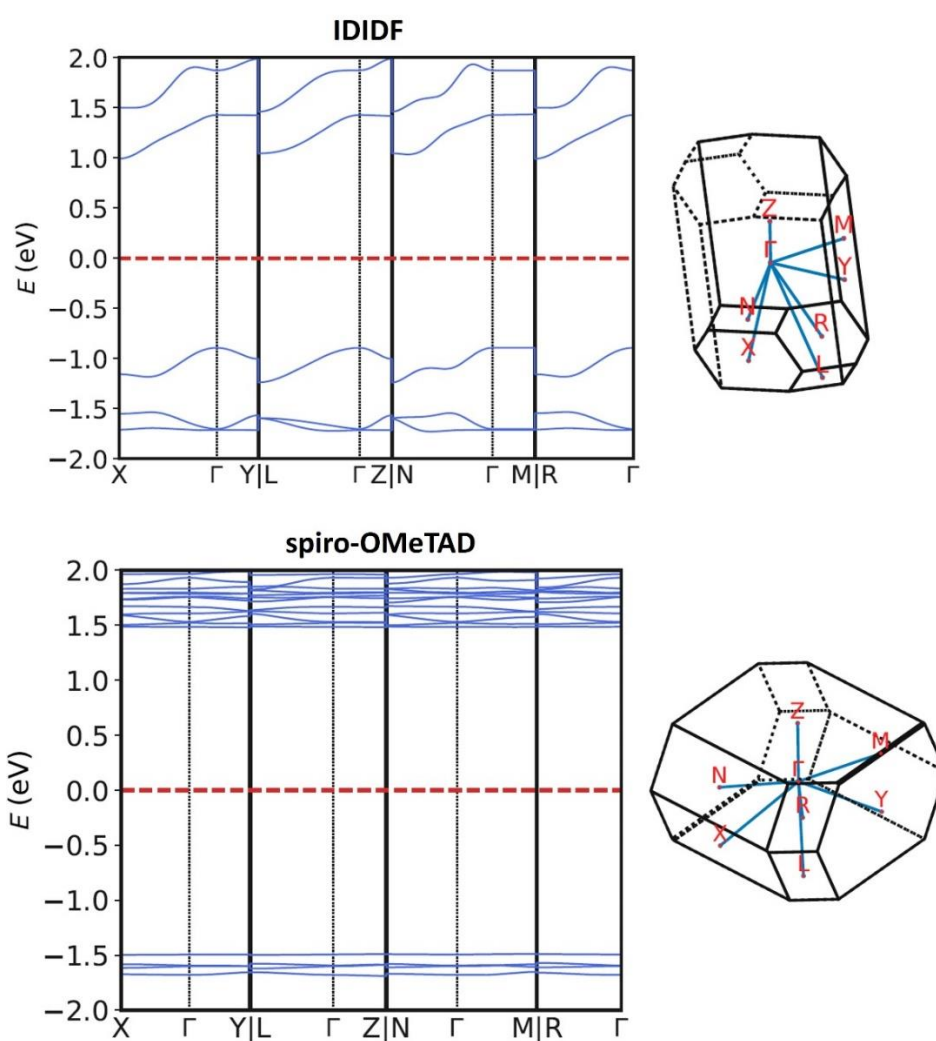**Figure S1.** Band structure diagrams for spiro-OMeTAD (left) and IDIDF (right) calculated at the HSE06 level along the full k-path of the Brillouin zone  $X-\Gamma-Y|L-\Gamma-Z|N-\Gamma-M|R-\Gamma$  according to the centrosymmetric triclinic space group  $P\bar{1}$  of spiro-OMeTAD and IDIDF.

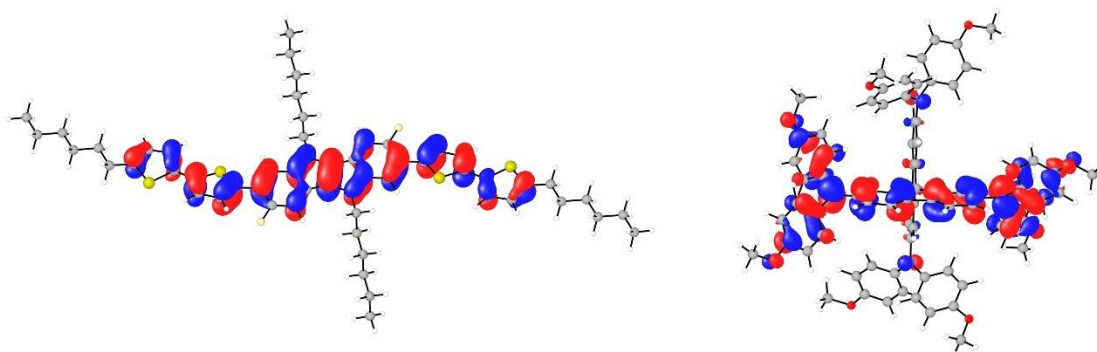

**Figure S2.** Highest-occupied molecular orbitals calculated at the XXX level for IDIDF (left) and spiro-OMeTAD (right).

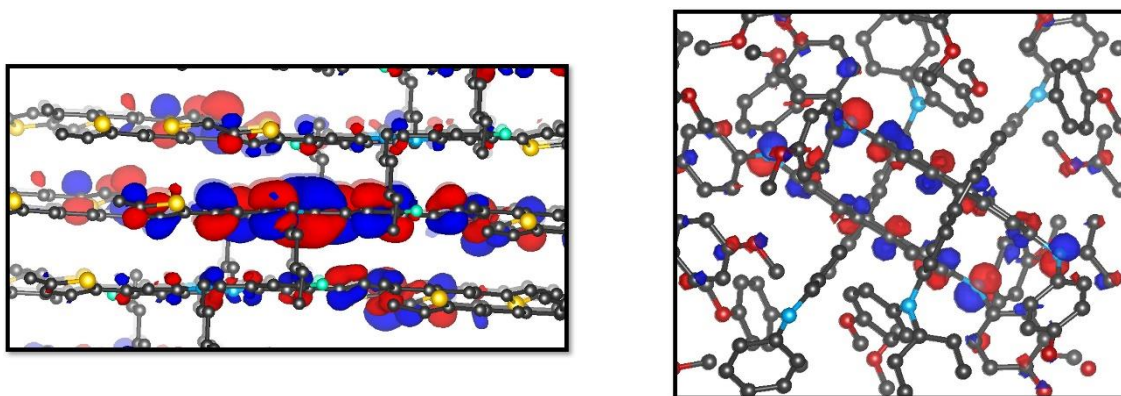

**Figure S3.** Crystal orbital representations of the valence band maximum (VBM) calculated at the HSE06 level of theory on the PBEsol-optimized geometries for IDIDF (left) and spiro-OMeTAD (right).

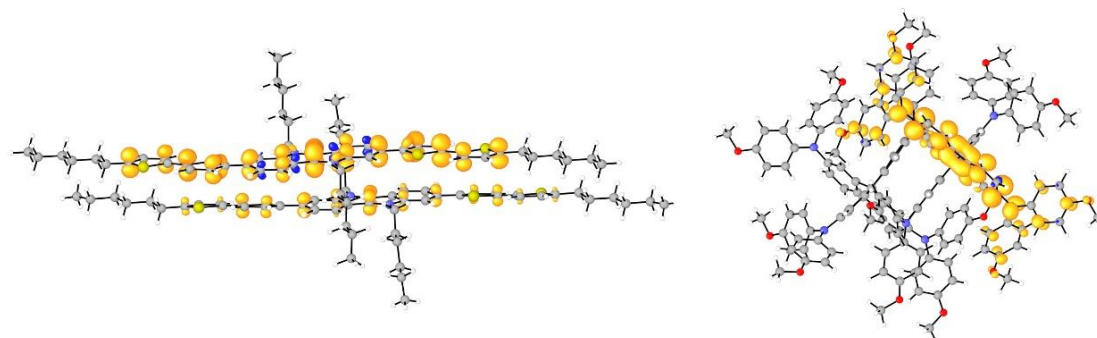

**Figure S4.** Spin density (isovalue = 0.01) calculated for the most interacting dimers of IDIDF (left) and spiro-OMeTAD (right) where one neutral molecule is replaced by its minimum-energy geometry in the cation state.

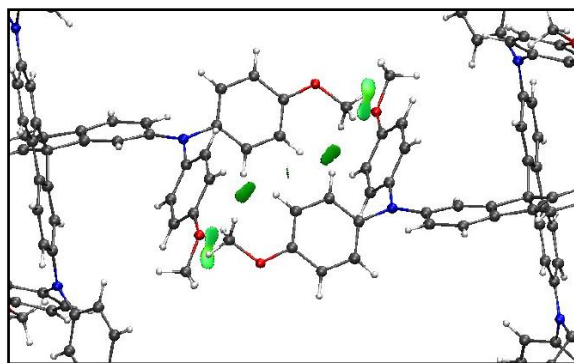

**Figure S5.** Non-covalent surfaces calculated for the  $\bar{1}\bar{1}\bar{1}$  dimer of spiro-OMeTAD, which possesses an electronic coupling of 2 meV.

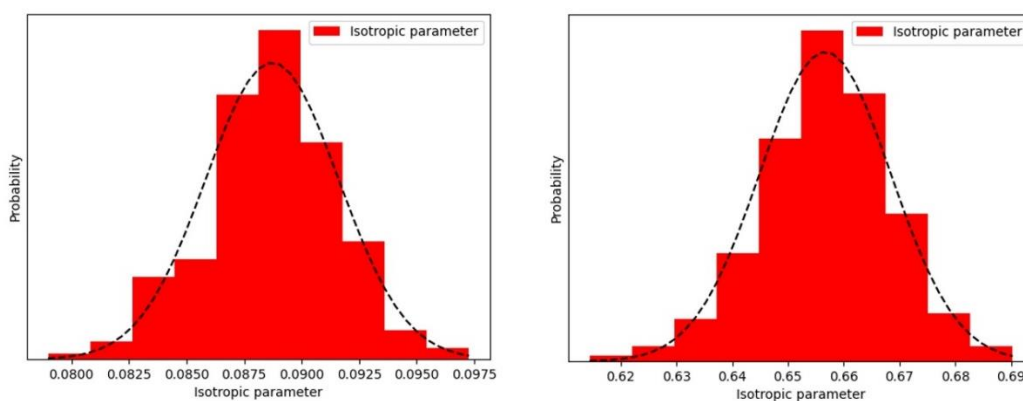

**Figure S6.** Normal distribution of the isotropic ISO parameter calculated for one molecule of IDIDF (left) and spiro-OMeTAD (right) HTMs along the molecular dynamics of the crystalline phase. The distribution parameters are:  $\bar{X} = 0.0887$ ,  $\sigma = 0.003$ ; and  $\bar{X} = 0.6567$ ,  $\sigma = 0.012$  for IDIDF and spiro-OMeTAD, respectively.

**Table S3.** Maximum values for the hole mobility calculated in each crystallographic axis and the mean value obtained considering all the crystallographic planes explored (*ab*, *bc*, and *ac*) in the static crystals (0 K) and considering dynamic disorder (298 K) for IDIDF and spiro-OMeTAD.

|                 | $\mu_{a\text{-axis}}$ | $\mu_{b\text{-axis}}$ | $\mu_{c\text{-axis}}$ | $\mu_{\text{mean}}$ |
|-----------------|-----------------------|-----------------------|-----------------------|---------------------|
| IDIDF           |                       |                       |                       |                     |
| Crystal (0 K)   | 6.806                 | 0.509                 | 2.938                 | 3.361               |
| Crystal (298 K) | 2.285                 | 0.161                 | 0.901                 | 1.078               |
| spiro-OMeTAD    |                       |                       |                       |                     |
| Crystal (0 K)   | 0.301                 | 0.115                 | 0.093                 | 0.150               |
| Crystal (298 K) | 0.041                 | 0.002                 | 0.004                 | 0.014               |

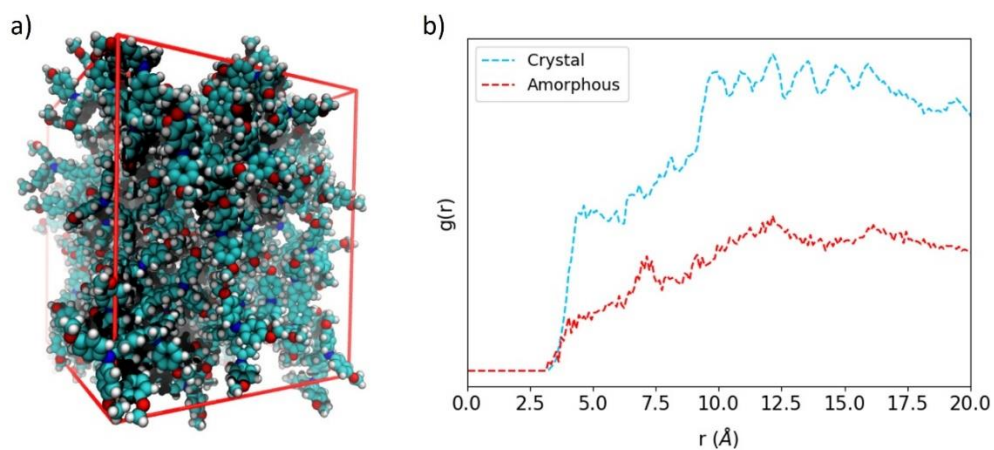

**Figure S7.** a) Representative snapshot of the amorphous spiro-OMeTAD phase. b) Radial distribution function of the centroid of a central molecule with respect to the other molecules in crystalline and amorphous spiro-OMeTAD.

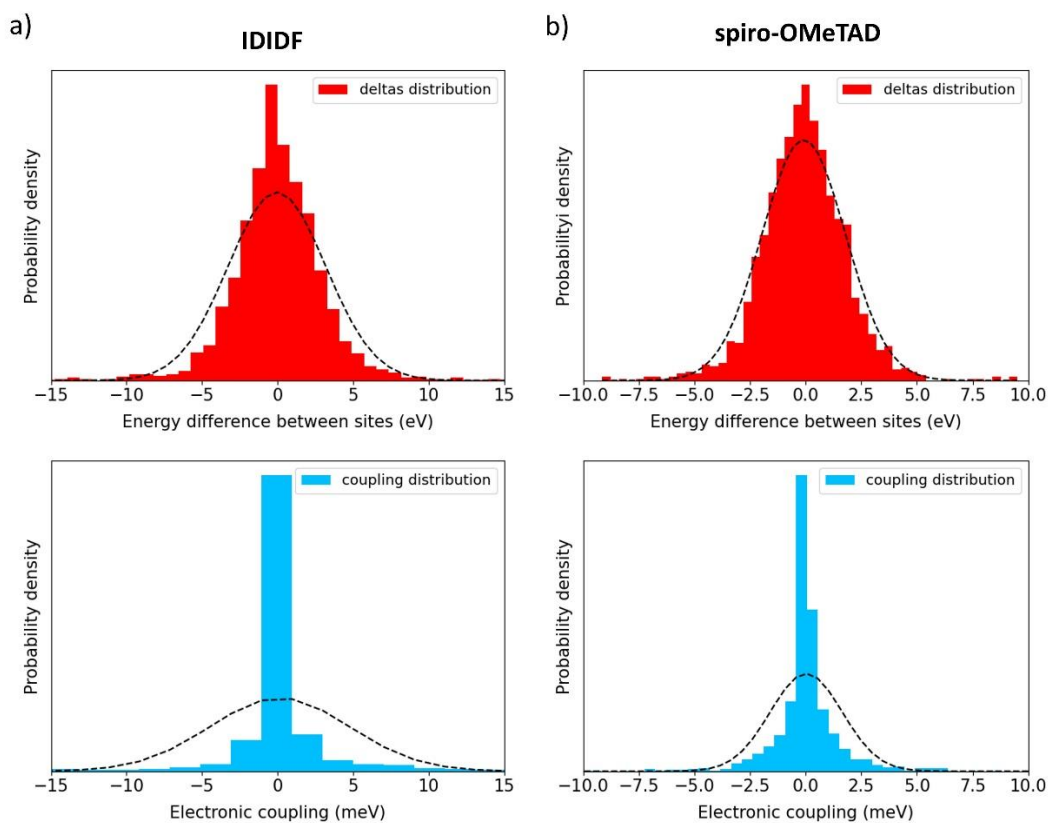

**Figure S8.** Normal distributions for the site energy (top) and dimer electronic coupling (bottom) of IDIF (a) and spiro-OMeTAD (b) obtained along the molecular dynamics simulations of the amorphous materials.

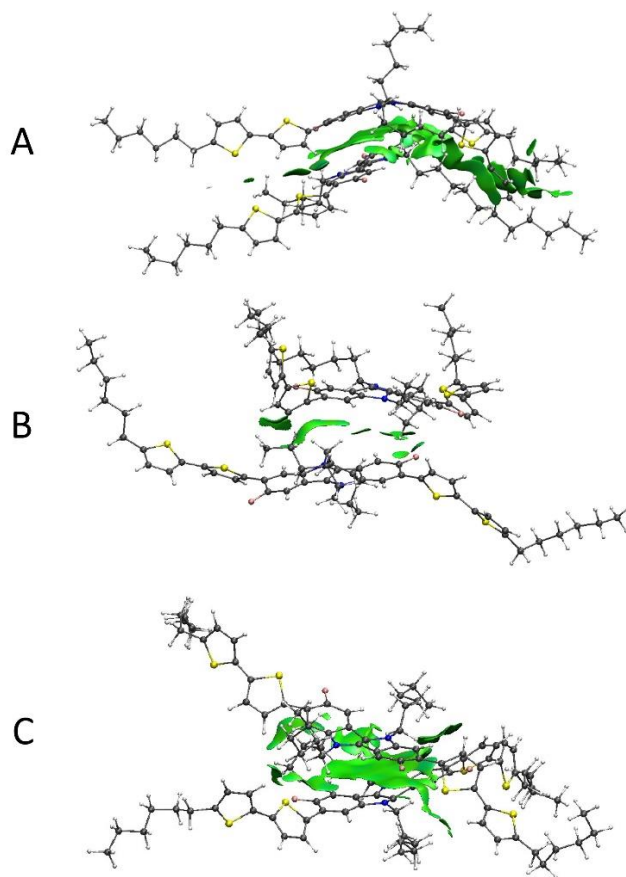

**Figure S9.** Non-covalent NCI surface plots of the reduced density gradient calculated using promolecular densities for dimers A, B and C of amorphous IDIDF indicated in Figure 9 of the main text.

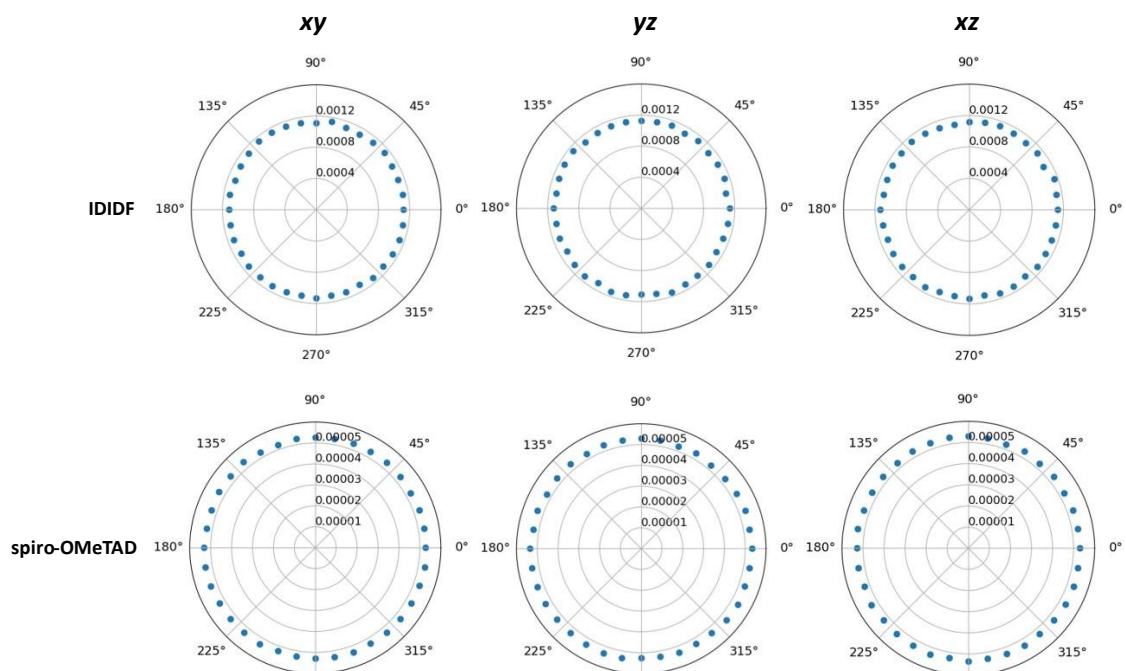

**Figure S10.** Hole mobilities calculated along the  $xy$ ,  $yz$  and  $xz$  planes for the amorphous materials of IDIDF and spiro-OMeTAD.

## References

- 1 H. Li and J. L. Brédas, *J. Phys. Chem. Lett.*, 2017, **8**, 2507–2512.
- 2 D. R. D'hooge, A. D. Trigilio, Y. W. Marien and P. H. M. van Steenberge, *Ind. Eng. Chem. Res.*, 2020, **59**, 18357–18386.
- 3 D. T. Gillespie, *J. Comput. Phys.*, 1976, **22**, 403–434.
- 4 R. A. Marcus, *Rev. Mod. Phys.*, 1993, **65**, 599.
- 5 V. Stehr, R. F. Fink, M. Tafipolski, C. Deibel and B. Engels, *Wiley Interdiscip. Rev. Comput. Mol. Sci.*, 2016, **6**, 694–720.
- 6 V. Stehr, J. Pfister, R. F. Fink, B. Engels and C. Deibel, *Phys. Rev. B*, 2011, **83**, 155208.
